# Supplementary material for: In vitro Pharmacokinetics/Pharmacodynamics Evaluation of Fosfomycin Combined with Amikacin or Colistin against KPC2-Producing Klebsiella pneumoniae
Source: PubMed Central journal article supplement (PMC5472793; doi:10.3389/fcimb.2017.00246), 2017-06-16
Supplement: Presentation1.pdf [file Presentation1.pdf]

- 1 **Supplemental Figure 1.** Pharmacokinetics Auto Simulation System 400.
- 2 **Supplemental Figure 2.** The time-concentration of antibiotics in the Pharmacokinetics Auto Simulation
- 3 System 400.
- 4 **Supplemental Figure 3.** The sketch of pharmacodynamic parameters. MKD, Maximum Kill Down;
- 5 MKT, Maximum Kill Time; AAKC, Area Above Kill Curve; RT, Bacterial growth recovery time; -1KT,
- 6 -1Log Kill Time; -2KT, -2Log Kill Time; -3KT, -3Log Kill Time; SRT, Regrowth Recovery Time; +1RT,
- 7 +1Log Growth Time; TAAKC, Total Area Above Kill Curve; AST, Analysis Start Time; T-1KT, Total
- 8 -1Log Kill Time.
